# Supplementary material for: Tuning the size of supramolecular M4L4 tetrahedra by ligand connectivity
Source: Royal Society of Chemistry journal article supplement (doi:10.1039/c2dt30888f), 2012-01-01
Supplement: c2dt30888f.pdf [file c2dt30888f.pdf]

**Supplementary information for:**

**Tuning the size of supramolecular  $M_4L_4$  tetrahedra by ligand connectivity**

Markus Albrecht,\*<sup>a</sup> Yuli Shang,<sup>a</sup> Kensuke Hasui,<sup>a,b</sup> Verena Gossen,<sup>a</sup> Gerhard Raabe,<sup>a</sup> Kazukuni Tahara<sup>b</sup> and Yoshito Tobe<sup>b</sup>

Representations of the containers  $[(L^1)_4Ti_4]^{8-}$  and  $[(L^2)_4Ti_4]^{8-}$  showing a compressed structure of  $[(L^1)_4Ti_4]^{8-}$  and the expanded structure of  $[(L^2)_4Ti_4]^{8-}$ .

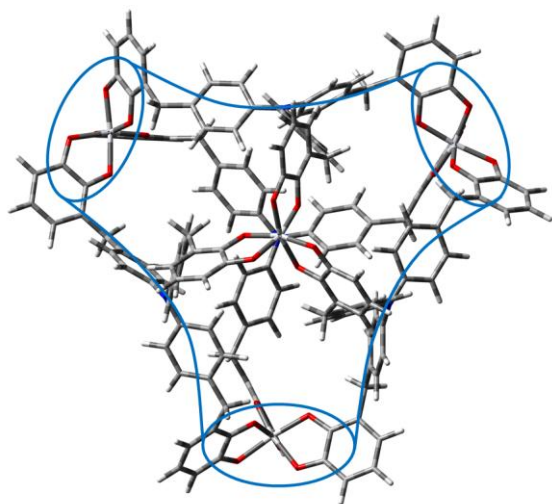

The blue line shows that the ligand  $L^1$  points inwards. Therefore, the cavity of the tetrahedron is small. The average Ti-N distance of the complex  $[(L^1)_4Ti_4]^{8-}$  is 9.51 Å.

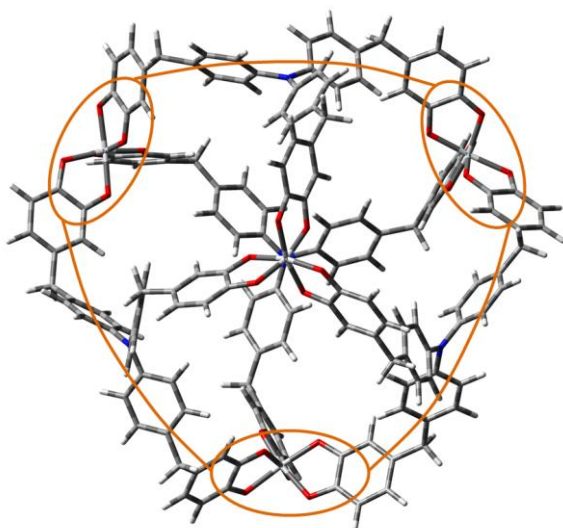

The red line shows that ligand  $L^2$  is nearly planar. The average Ti-N distance of the complex  $[(L^2)_4Ti_4]^{8-}$  is 10.37 Å which is 0.86 Å larger than the Ti-N distance of the tetrahedron with ligand  $L^1$ .

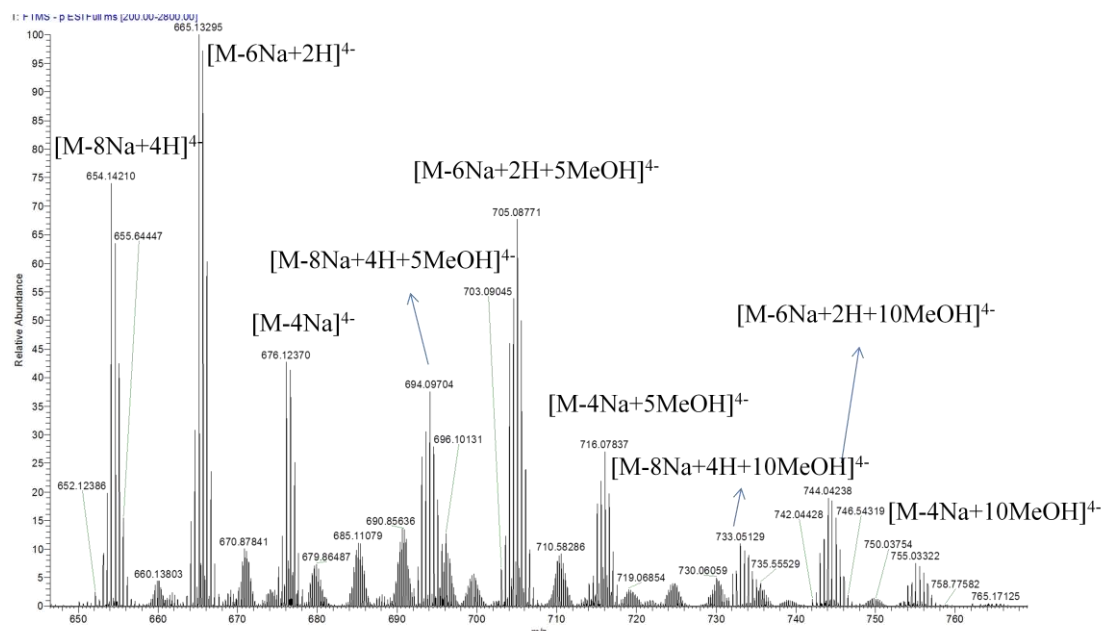

ESI MS in methanol of  $\text{Na}_8[(\mathbf{1})_4\text{Ti}_4]$

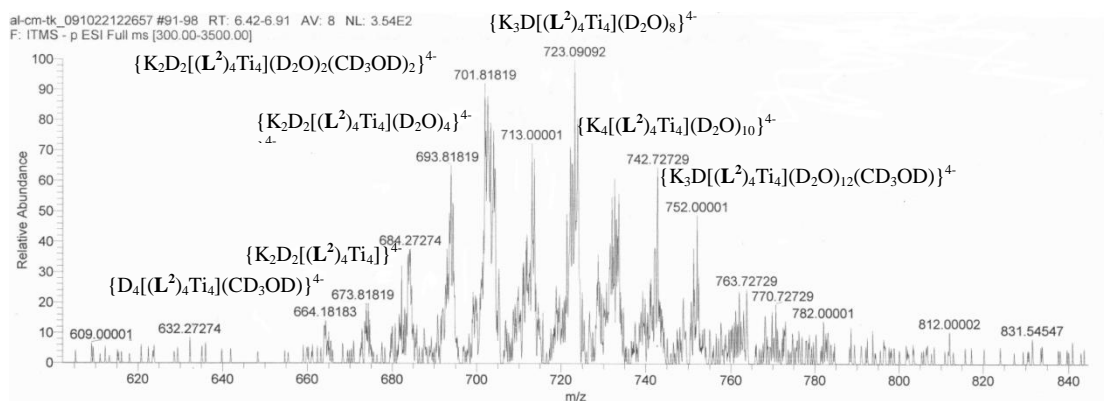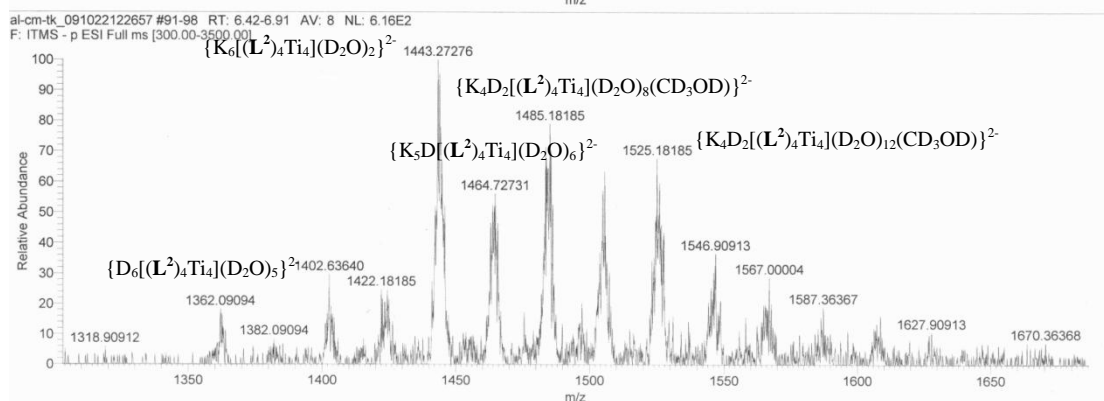

Relevant parts of the ESI MS spectrum of  $\text{Na}_8[(\mathbf{2})_4\text{Ti}_4]$ . (The sample was directly sprayed from deuterated solvents in order to guarantee that the species detected by NMR and MS are the same).
